1 **Brain Transcriptional Profiles of Male Alternative Reproductive Tactics and**  
2 **Females in Bluegill Sunfish**

3

4 Short Title: Brain transcriptome of bluegill male ARTs

5

6 Charlyn G. Partridge<sup>1,2\*</sup>, Matthew D. MacManes<sup>3</sup>, Rosemary Knapp<sup>4</sup>, Bryan D. Neff<sup>2</sup>

7

8 <sup>1</sup>Annis Water Resources Institute, Grand Valley State University, Muskegon,  
9 Michigan 49441, United States of America

10 <sup>2</sup>Department of Biology, University of Western Ontario, London, Ontario N6A 3K7,  
11 Canada

12 <sup>3</sup>Department of Molecular, Cellular, and Biomedical Sciences, University of New  
13 Hampshire, Durham, New Hampshire 03824, United States of America

14 <sup>4</sup>Department of Biology, University of Oklahoma, Norman, Oklahoma 73019, United  
15 States of America

16

17

18 \*Corresponding author:

19 Email: [partridc@gvsu.edu](mailto:partridc@gvsu.edu)

20

21

22

## Abstract

23  
24  
25  
26  
27  
28  
29  
30  
31  
32  
33  
34  
35  
36  
37  
38  
39  
40  
41  
42  
43  
44  
45  
46  
47

Bluegill sunfish are one of the classic systems for studying male alternative reproductive tactics (ARTs) in teleost fishes. In this species, there are two distinct life histories: parental and cuckolder, encompassing three reproductive tactics, parental, satellite, and sneaker. The parental life history is fixed, whereas individuals who enter the cuckolder life history transition from the sneaker to the satellite tactic as they grow. For this study, we used RNAseq to characterize the brain transcriptome of the three male tactics and females during spawning to identify gene categories associated with each tactic and identify potential candidate genes influencing their different spawning behaviors. We found that sneaker males had higher levels of gene differentiation compared to the other two male tactics. Sneaker males also had high expression in ionotropic glutamate receptor genes, specifically AMPA receptors, which may be important for increased working spatial memory while attempting to cuckold parental males at their nests. Larger differences in gene expression also occurred among male tactics than between males and females. We found significant expression differences in several candidate genes that were previously identified in other species with ARTs and suggest a previously undescribed role for cAMP-responsive element modulator (*crem*) in influencing parental male behaviors during spawning.

Keywords: alternative reproductive tactics, bluegill, brain, transcriptome, spawning behavior, sex differences

## Introduction

48  
49  
50           Understanding the genes that influence variation in behavior can provide  
51 insight into how different behavioral phenotypes within populations evolve and are  
52 maintained. One important area of research on behavioral phenotypes focuses on  
53 alternative reproductive tactics (ARTs), which are found in a wide array of taxa [1-  
54 5]. ARTs typically consist of larger males practicing a “territorial” tactic that  
55 maintain and protect breeding territories and smaller “sneaking” males that sneak  
56 fertilizations rather than compete with territorial males [6]. The mechanisms  
57 underlying the expression of ARTs can differ significantly across species. In some  
58 cases, tactics are fixed for life (fixed tactics) [6] and often represent distinct life  
59 histories. Fixed tactics can occur through either inherited genetic polymorphisms  
60 [7-10], condition-dependent switches that are triggered prior to sexual maturation  
61 [1,6,11], or a combination of genetic and environmental factors [12,13]. In other  
62 cases, individuals can exhibit different tactics throughout their reproductive life,  
63 either as they grow or in response to changing social or environmental context  
64 (plastic tactics or status-dependent tactics) [1,4,6,14]. Advances in sequencing  
65 technology, such as RNA sequencing (RNAseq), now allow behavioral ecologists to  
66 explore how variation in gene expression contributes to behavioral variation among  
67 mating tactics and examine if the genes influencing these behaviors differ across  
68 species with ARTs.

69           Next-generation sequencing has led to more in-depth research into the  
70 molecular mechanisms driving ARTs [9,15-20]. For example, development of  
71 independent (territorial) males and two alternative tactics, satellite males and

72 female-mimicking (faeder) males in a shorebird (the ruff, *Philomachus pugnax*) is  
73 driven by a supergene resulting from a chromosome inversion that contains 125  
74 predicted genes potentially influencing ART traits [9,10]. However, due to the lack of  
75 reference genomes for most teleosts, much of the work on ARTs in this group has  
76 focused on examining differential gene expression to identify genes associated with  
77 these tactics. Most of these studies have found a large number of genes that vary  
78 among tactics in expression in the brain during mating. For example, in the ocellated  
79 wrasse (*Symphodus ocellatus*), 1,048 genes were differentially expressed when  
80 comparing sneakers to two other male tactics (nesting and satellite) and to females  
81 [19]. In the black-faced blenny (*Tripterygion delaisi*) and peacock blenny (*Salaria*  
82 *pavo*), RNAseq identified approximately 600 transcripts differentially expressed  
83 within the brains of 'sneaker' versus other male tactics [18, 20]. In another study,  
84 approximately 2,000 transcripts were differentially expressed between  
85 intermediate-sized sailfin molly (*Poecilia latipinna*) males that primarily perform  
86 courtship behaviors compared to small males that only perform sneaking behaviors  
87 [17]. Changes in social context also led to a larger response (i.e. changes in gene  
88 expression) in intermediate-sized males that show higher levels of tactic plasticity  
89 when compared to small sneaker males [17], suggesting that genes driving neural  
90 response during mating may differ between plastic and fixed tactics.

91         With the increase in genomic studies examining differences among ARTs,  
92 there are a growing number of candidate genes associated with these tactics.  
93 Schunter *et al.* [18] proposed a list of potential candidate genes based on a number  
94 of studies (Table 1).

95

96 **Table 1: Proposed candidate genes (from [18]) influencing teleost alternative reproductive**  
 97 **tactics (ARTs). POA = Pre-optic area**

| Proposed Candidate Genes                                                 | Function                                                                                                                                                       | Relationship to ARTs                                                                                                                                                                                                                                   |
|--------------------------------------------------------------------------|----------------------------------------------------------------------------------------------------------------------------------------------------------------|--------------------------------------------------------------------------------------------------------------------------------------------------------------------------------------------------------------------------------------------------------|
| Arginine vasotocin ( <i>avt</i> )                                        | Non-mammalian homolog of vasopressin. Activates some aspects of sexual behavior                                                                                | ↑ in posterior POA of territorial cichlid males, but ↑ anterior POA of non-territorial [21]; ↓ density of <i>avt</i> mRNA in POA in parental blenny males [22]                                                                                         |
| Gonadotropin releasing hormone ( <i>gnrh</i> )                           | Regulates release of luteinizing hormone and follicle-stimulating hormone from the pituitary gland                                                             | ↑ in territorial cichlid males [16]                                                                                                                                                                                                                    |
| Cytochrome P450 family 19, subfamily A, polypeptide 1 ( <i>cyp19a1</i> ) | Brain aromatase. Key enzyme in estrogen biosynthesis                                                                                                           | ↑ in territorial cichlid males [16]; ↑ territorial blenny males [23]; ↑ territorial black-faced blenny males [18]; ↓ in the sonic motor nucleus of nesting type I (territorial) male plainfin midshipman compared to type II (female mimic) males [24] |
| Ependymin ( <i>epd</i> )                                                 | Glycoprotein associated with neuroplasticity and neuronal regeneration. Also affects aggression levels in zebrafish [25]; Associated with stress in trout [26] | ↑ in territorial cichlid males [16]; ↓ in subordinate trout males [25]                                                                                                                                                                                 |
| Galanin/GMAP prepropeptide ( <i>gal</i> )                                | Neuropeptide that influences neurotransmitters. Associated with male sexual behaviors [27] and parental care [28]                                              | ↑ in territorial cichlid males [16]                                                                                                                                                                                                                    |
| Somatostatin ( <i>sst</i> )                                              | Neuropeptide that regulates endocrine pathways. Also affects neurotransmitters                                                                                 | ↑ in territorial blenny males [18]; ↑ in territorial cichlid males [16]                                                                                                                                                                                |
| Early growth response 1 ( <i>egr1</i> )                                  | Transcription factor that influences neural plasticity                                                                                                         | ↑ when subdominant cichlid males switch to dominant [29]                                                                                                                                                                                               |

98

99

100           This list included gonadotropin releasing hormone (*gnrh*), arginine vasotocin  
101 (*avt*), cytochrome P450 family 19 subfamily A polypeptide 1 (*cyp19a1*), ependymin  
102 (*epd*), galanin (*gal*), stomatostatin (*sst1* and *sst3*), and early growth response 1  
103 (*egr1*). Many of these genes are known to be involved in hormone regulation and  
104 vertebrate mating behavior, and differences in expression levels have been  
105 observed among mating tactics in different fish species. For example, the product of  
106 the *cyp19a1b* gene is aromatase B, the key enzyme responsible for the conversion of  
107 androgens to estrogens within the brain of vertebrates [e.g., 24,30]. *Cyp19a1* also  
108 plays an important role in sex determination and sex change in fish [31-33]. Higher  
109 levels of *cyp19a1b* expression have been observed in territorial males compared to  
110 sneaker males in the peacock blenny [23], black-faced blenny [18], and an African  
111 cichlid (*Astatotilapia burtoni*) [16]. As more data become available, the number of  
112 candidate genes in this list will likely increase and evaluating gene expression  
113 across teleosts will aid in determining whether similar molecular pathways drive  
114 ART behaviors across different species.

115           One of the best-studied vertebrate species with male ARTs is the bluegill  
116 sunfish (*Lepomis macrochirus*). In this species, males have two distinct life histories:  
117 parental and cuckolder. In Lake Opinicon (Ontario, Canada), parental males mature  
118 at around seven years old and construct nests, court females, and provide care to  
119 young [34]. Cuckolder males mature at a significantly younger age, around two  
120 years old [34]. Rather than competing with parental males for access to females,  
121 cuckolders initially use a “sneaking” tactic to dart in and out of nests while parental  
122 males and females are spawning. As they grow, typically around an age of 4 years,

123 cuckolder males appear to transition into “satellite” males by taking on female-like  
124 coloration and behaviors [34,35]. Satellite males use this female mimicry to deceive  
125 a parental male that he has two true females in his nest [36]. The parental and  
126 cuckolder life histories are fixed – once a male adopts the parental or cuckolder life  
127 history he remains in that life history [37]. However, within the cuckolder life  
128 history, mating tactics are developmentally plastic, with males apparently  
129 transitioning from the sneaker tactic to the satellite tactic as they age [37].

130         While the spawning behavior, reproductive success, and hormone profiles of  
131 bluegill have been studied extensively [37-42], the genes influencing behavioral  
132 differences during spawning are less clear [43]. Thus, for this study, we used  
133 RNAseq to characterize the brain transcriptome of the three spawning male tactics  
134 (parental, sneaker, and satellite), non-spawning parental males, and spawning  
135 females to examine how differences in gene expression may relate to behavioral  
136 variation among these groups. Specifically, we (1) assessed whether or not there is a  
137 greater difference in gene expression profiles between fixed tactics (parental versus  
138 the two cuckolder tactics) than between tactics within a plastic life history (sneaker  
139 versus satellite), (2) identified specific gene categories that are expressed for each  
140 tactic, (3) compared expression differences between male and female bluegill, and  
141 (4) examined the expression of potential candidate genes identified from other fish  
142 species to determine if they also differentiate ARTs in bluegill.

143

144

145

146

## Materials and Methods

### 147 Bluegill Sampling

148           In June 2013, bluegill sunfish were collected via dip net from Lake Opinon  
149 near Queen's University Biological Station (QUBS), Elgin, Ontario, Canada. A total of  
150 12 parental males, 12 sneaker males, 13 satellite males, and 12 females were  
151 collected directly from the bluegill colony while in the act of spawning. A spawning  
152 bout in bluegill typically occurs over the course of one day, following a period of  
153 several days of nest construction by parental males. All spawning fish used in this  
154 study were behaviorally verified as to tactic before being collected. An additional 12  
155 non-nesting parental males were collected four days prior to spawning (as  
156 determined once spawning at these colonies began). Individuals were euthanized  
157 using clove oil, total body length was measured, and brains were immediately  
158 dissected out and stored in RNAlater (Life Technologies, Carlsbad, CA). Brains  
159 remained in RNAlater at 4°C for 24 hours and were then transferred to fresh  
160 cryovials, flash frozen, and kept in liquid nitrogen until they were transported on  
161 dry ice to the University of Western Ontario. Samples were then stored at -80°C  
162 until RNA extraction. The Animal Care Committee at Western University (UCC)  
163 approved all procedures preformed in this study (AUP # 2010-214).

164

### 165 Total RNA Extraction

166           Total RNA was extracted using a standard Trizol (Life Technologies,  
167 Carlsbad, CA) extraction. RNA was submitted to the London Genomics Center at the  
168 University of Western Ontario and quality was assessed using a 2100 Bioanalyzer



169 (Agilent Technologies, Palo Alto, CA). Four individuals from each group (spawning  
170 parental males, non-spawning parental males, sneaker males, satellite males, and  
171 females), for a total of 20 individuals, were submitted to the Michigan State  
172 University Research Technology Support Facility - Genomics Center for cDNA  
173 library construction and sequencing. Individuals used for this study had RIN (RNA  
174 Integrity Number) values ranging from 9.2-9.9.

175

#### 176 cDNA Library Construction and Sequencing

177 The cDNA libraries were constructed for each individual using Illumina  
178 TrueSeq Stranded mRNA Library Preparation Kits LT (Illumina, San Diego, CA), with  
179 each individual receiving a uniquely identifiable index tag. The quality of each  
180 library was evaluated and the 20 individuals were multiplexed into a single sample  
181 that was subsequently run on two lanes of an Illumina HiSeq2500 Rapid Run flow  
182 cell (v1). Sequencing was performed on paired end 2 x 150 bp format reads and  
183 bases were called using Illumina Real Time Analysis software (v1.17.21.3). Reads  
184 from each individual were identified based on their unique index tag, separated, and  
185 converted to fastq files using Illumina Bcl2fastq v1.8.4. Sequencing produced an  
186 average of 14.5 million reads per individual, with over 90% of the reads having a Q-  
187 score >30.

188

#### 189 De novo Transcriptome Assembly and Reference Transcriptome

190 Prior to assembly, read quality was assessed using FastQC  
191 (<http://www.bioinformatics.babraham.ac.uk/projects/fastqc>). Nucleotides whose

192 quality score was below PHRED=2 were trimmed using Trimmomatic version 0.32  
193 [44], following recommendations from MacManes [45]. The reference transcriptome  
194 was assembled *de novo* using Trinity version 2.04 [46,47]. One representative of  
195 each of the five groups (spawning parental male, non-spawning parental male,  
196 sneaker male, satellite male, and female) was used to construct a combined  
197 reference transcriptome. The five representatives selected for the reference were  
198 the individuals with the highest number of reads within their group and, a total of  
199 85 million paired-end reads were assembled. The assembly was conducted with  
200 both normalized and non-normalized reads and normalization was performed using  
201 Trinity's *in silico* normalization program. To test the completeness of the  
202 transcriptome, reads from samples not used in the assembly were mapped back to  
203 the transcriptome using Burrows-Wheeler Aligner (bwa)-mem version 0.7.12 [48],  
204 and >90% of those reads aligned, which is comparable to the rate of mapping for the  
205 individuals used in the assembly (92%).

206 TransDecoder [46] was used to identify protein-coding regions within the  
207 assembled transcriptome. Transcripts that contained protein-coding regions or  
208 transcripts that blasted to complete coding sequences (cds) and non-coding RNA  
209 (ncRNA) from spotted green puffer (*Tetraodon nigroviridis*), spotted gar (*Lepisosteus*  
210 *oculatus*), southern platyfish (*Xiphophorus maculatus*), medaka (*Oryzias latipes*),  
211 Japanese pufferfish (*Takifugu rubripes*), West Indian Ocean coelacanth (*Latimeria*  
212 *chalumnae*), Mexican tetra (*Astyanax mexicanus*), zebrafish (*Danio rerio*), or Amazon  
213 molly (*Poecilia formosa*) (downloaded from Ensembl) comprised the reference  
214 transcriptome used for both read alignment and to estimate transcript counts.

## 215 Read Alignment and Transcript Counts

216 Reads from each individual were separately aligned to the reference  
217 transcriptome using bwa-mem 0.7.10 [48]. At least 85% of all reads from each  
218 individual mapped back to the reference, with the majority aligning 90% of reads or  
219 higher. The sequence alignment/map (sam) files were then converted to a binary  
220 format (bam) using Samtools 0.1.19 [49]. Transcript counts for each individual were  
221 obtained using the program eXpress 1.5.1 [50]. Differential gene expression was  
222 determined using the R statistical package edgeR 3.6.8 [51]. Low abundance  
223 transcripts were filtered out, leaving 19,804 transcripts for differential analysis.  
224 Transcript counts were normalized to account for differences in cDNA library size  
225 among individuals and dispersion parameters were estimated using Tagwise  
226 dispersion estimates. Differences in gene expression comparing paired treatments  
227 were calculated using an Exact-test for binomial distribution. Genes with p-values  
228 lower than 0.05 after false discovery rate (FDR) correction were determined to be  
229 statistically significant. All fold changes are reported as log<sub>2</sub> fold change. Genes with  
230 FDR values below 0.05 and with log<sub>2</sub> fold changes greater than 1.5 were used for  
231 hierarchical cluster analysis to examine overall group differences.

232

## 233 Gene Annotation and Enrichment Analysis

234 Both the reference transcriptome and transcripts differentially expressed  
235 among groups were blasted using Blastx against a custom-assembled fish protein  
236 database. This database consisted of Ensembl protein databases of 13 different fish  
237 species: Amazon molly (*Poecilia formosa*), zebrafish (*Danio rerio*), Mexican tetra

238 (*Astyanax mexicanus*), Atlantic cod (*Gadus morhua*), West Indian Ocean coelacanth  
239 (*Latimeria chalumnae*), Japanese pufferfish (*Takifugu rubripes*), sea lamprey  
240 (*Petromyzon marinus*), medaka (*Oryzias latipes*), southern platyfish (*Xiphophorus*  
241 *maculatus*), spotted gar (*Lepisosteus oculatus*), three-spined stickleback  
242 (*Gasterosteus aculeatus*), green spotted pufferfish (*Tetradon nigroviridis*), and Nile  
243 tilapia (*Oreochromis niloticus*). Blast hits with e-values less than  $1 \times 10^{-10}$  were  
244 considered significant. Ensembl IDs from the blast hits were then converted into GO  
245 term identifiers using Biology Database Network (bioDBnet)  
246 (<http://biodbnet.abcc.ncifcrf.gov/db/dbFind.php>).

247 For purposes of gene annotation and enrichment analysis, we focused on  
248 transcripts within the reference transcriptome that were not filtered out of the data  
249 set due to low transcript expression (total of 19,804 transcripts). To examine which  
250 GO terms were significantly enriched within this set, unique Ensembl IDs from  
251 Blastx were converted to Ensemble IDs associated with stickleback homologs using  
252 the R package biomaRt 2.20.0. Enrichment analysis relative to the stickleback  
253 genome was then conducted on these homologs using the BioMart portal  
254 (<http://central.biomart.org/enrichment>).

255 For the transcripts that were differentially expressed among behavioral groups,  
256 enrichment analysis was conducted using a Fisher Exact test to examine whether  
257 the proportion of genes within each GO category was significantly higher than what  
258 would be expected based upon the proportion of genes assigned to that GO term  
259 within the reference transcriptome. To ensure adequate statistical power, only GO  
260 terms with at least 10 transcripts within each category were included in the

261 statistical analysis. A FDR correction was applied to control for multiple testing and  
262 GO terms with p-values < 0.05 were considered to be significant. Visual  
263 representations of enriched GO terms were generated using REVIGO [52].

264

## 265 **Results**

### 266 Reference Transcriptome

267 This study presents the first reference transcriptome for the brain of bluegill  
268 sunfish. The fully assembled transcriptome consisted of 272,189 transcripts. Of  
269 these, 72,189 transcripts contained cds or blasted to ncRNA from the customized  
270 Ensembl fish database. These 72,189 transcripts were then used as the reference  
271 transcriptome for alignment and mapping. The mean transcript length within the  
272 reference transcriptome was 2,024 bp, with N50 = 3,106 bp and N90 = 1,018 bp.  
273 The largest transcript consisted of 27,880 bp. Approximately 82% of the transcripts  
274 had only one isoform, while 18% (12,951 transcripts) had two or more isoforms.

275 For GO enrichment analysis, we only examined the 19,804 transcripts within  
276 the reference transcriptome that passed our established filtering process. Of these,  
277 18,104 had significant Blastx hits with Ensembl gene IDs (S1 Table), of which 12,224  
278 transcripts had stickleback homologs that could be used to examine GO term  
279 enrichment for the bluegill brain transcriptome compared to the stickleback  
280 genome. The GO terms with significant enrichment for the bluegill reference  
281 transcriptome included translation, catabolism, vesicle-mediated transport,  
282 biosynthesis, small molecule metabolism, and generation of precursor metabolites  
283 and energy (Figure 1 A & B).

284 Differential Gene Expression across All Groups

285           Based on hierarchical cluster analysis, sneaker males grouped separately  
286 from the other male tactics (Figure 2). Spawning parental males, non-spawning  
287 parental males, and females displayed similar expression profiles to each other.  
288 Satellite males tended to have expression profiles intermediate of sneakers and the  
289 other groups.

290           When comparing across all groups, five unique transcripts consistently  
291 displayed higher expression in spawning parental males compared to all other  
292 groups (Table 2). Fourteen unique transcripts were differentially expressed in  
293 satellite males compared to all other groups. Expression for these transcripts in  
294 satellite males was higher compared to parental males (spawning and non-  
295 spawning) and females, but lower compared to sneaker males (Table 2). There were  
296 2,253 transcripts differentially expressed between sneaker males and all other  
297 groups (S2 Table). The majority of these transcripts with higher expression in  
298 sneakers were related to ion transport, ionotropic glutamate signaling pathway, and  
299 mRNA processing (Figure 3). Two transcripts were differentially expressed in  
300 females compared to the other groups and both of these were expressed at lower  
301 levels than in the other groups (Table 2).

302

303 **Table 2: Differentially expressed transcripts associated with each male mating tactic and**  
 304 **females.**

| Sunfish Focal Group                                                                                                                                         | Differentially Expressed Genes                                                                                                                                                                                                                                                                                                                                                                                                                                                                                                                                                                                                                                                                                                                                                                                                                                                                                                                                                                                                                                                                                                                                                                       |
|-------------------------------------------------------------------------------------------------------------------------------------------------------------|------------------------------------------------------------------------------------------------------------------------------------------------------------------------------------------------------------------------------------------------------------------------------------------------------------------------------------------------------------------------------------------------------------------------------------------------------------------------------------------------------------------------------------------------------------------------------------------------------------------------------------------------------------------------------------------------------------------------------------------------------------------------------------------------------------------------------------------------------------------------------------------------------------------------------------------------------------------------------------------------------------------------------------------------------------------------------------------------------------------------------------------------------------------------------------------------------|
| <i>Parental Males (Spawning)</i> -<br>Expression levels are higher in parental males compared to other groups, except for MHC class 1 antigen.              | <ul style="list-style-type: none"> <li>• Pancreatic progenitor cell differentiation and proliferation (<i>ppdpf</i>): FC = 1.8</li> <li>• Potassium voltage-gated channel, Isk-related family, member 4 (<i>kcne4</i>): FC = 1.4</li> <li>• Cysteine dioxygenase type 1 (<i>cdol</i>), 3 isoforms: FC = 1.7</li> <li>• cAMP-responsive element modulator (<i>crem</i>), 2 isoforms: FC = 2.1</li> <li>• MHC class 1 antigen: FC = -5.5</li> </ul>                                                                                                                                                                                                                                                                                                                                                                                                                                                                                                                                                                                                                                                                                                                                                    |
| <i>Satellite Males</i> -<br>Fold changes are higher compared to parental males (spawning and non-spawning) and females but lower compared to sneaker males. | <ul style="list-style-type: none"> <li>• Serine/arginine-rich splicing factor 4-like (<i>srsf4</i>): FC = 1.4 (other groups)/-0.7 (sneaker)</li> <li>• Arginine/serine-rich protein 1 (<i>rsrp1</i>), 2 isoforms: FC = 0.8/-0.6</li> <li>• CLK4-associating serine/arginine rich protein (<i>clsrp</i>): FC = 0.8/-0.8</li> <li>• RNA binding motif protein, X-linked (<i>rbmx</i>): FC = 0.9/-0.9</li> <li>• Dual specificity protein kinase CLK4-like (<i>clk4</i>), 2 isoforms: FC = 0.9/-0.8</li> <li>• Ultraconserved element locus (57322): FC = 1.0/-0.9</li> <li>• Cat eye syndrome chromosome region, candidate 2 (<i>cecr2</i>): FC = 1.6/-1.0</li> <li>• Luc7-like protein 3-like (<i>luc7l3</i>): FC = 0.8/-0.8</li> <li>• SET domain, bifurcated 1 (<i>setdb1</i>): FC = 0.8/-0.8</li> <li>• SUZ12 polycomb repressive complex 2 subunit (<i>suz12</i>): FC = 1.4/-1.2</li> <li>• O-linked N-acetylglucosamine (GLCNac) transferase (<i>ogt</i>): FC = 0.7/-0.8</li> <li>• Serine/arginine-rich splicing factor 3-like (<i>srsf3</i>): FC = 1.1/-0.9</li> <li>• RNA-binding protein 25-like (<i>rbm25</i>): FC = 0.7/ -0.7</li> <li>• Uncharacterized protein: FC = 1.5/-0.9</li> </ul> |
| <i>Sneaker Males</i> -                                                                                                                                      | <ul style="list-style-type: none"> <li>• 2,253 differentially expressed transcripts (S2 Table)</li> <li>• Transcripts with high expression related to ion transport, ionotropic glutamate receptor signaling pathway, and mRNA processing (Figure 3)</li> </ul>                                                                                                                                                                                                                                                                                                                                                                                                                                                                                                                                                                                                                                                                                                                                                                                                                                                                                                                                      |
| <i>Females</i> -<br>Expression levels are lower compared to other groups                                                                                    | <ul style="list-style-type: none"> <li>• Protachykinin-like (<i>tac</i>): FC = -1.6</li> <li>• Galanin/GMAP prepropeptide (<i>gal</i>): FC = -1.7</li> </ul>                                                                                                                                                                                                                                                                                                                                                                                                                                                                                                                                                                                                                                                                                                                                                                                                                                                                                                                                                                                                                                         |

305 FC = Mean log2 fold change across comparisons. Positive numbers indicate expression levels that  
 306 were higher in focal group compared to other groups, negative numbers indicate expression is lower  
 307 in focal group. For satellite males, the first FC value is the mean log2 fold change of satellite males  
 308 compared to spawning and non-spawning parental males and females. The second FC value is  
 309 satellite males compared to sneaker males. When transcripts had multiple isoforms, FC values were  
 310 averaged across isoforms.

311  
 312  
 313  
 314  
 315  
 316

317 Between Life History Comparisons

318 *Spawning Parental Males versus Sneaker Males.* A total of 9,279 transcripts were  
319 differentially expressed between spawning parental males and sneaker males. Of  
320 these, 4,537 transcripts showed higher expression in parental males (S3 Table) and  
321 4,742 transcripts showed higher expression in sneaker males (S4 Table).

322 Enrichment analysis of GO terms associated with differentially expressed  
323 genes showed that the biological functions most enriched in parental males included  
324 translation, translational initiation, translation elongation, proteolysis involved in  
325 cellular protein catabolism, and oxidation-reduction processes (S5 Table). The 27  
326 molecular processes most enriched in parental males compared to sneaker males  
327 included ribosomal structure, oxidoreductase activity and catalytic activity (S5  
328 Table).

329 Biological processes enriched with genes displaying higher expression in  
330 sneaker males included ion transport, homophilic cell adhesion, protein  
331 phosphorylation, ionotropic glutamate receptor signaling pathway, and synaptic  
332 transmission (S5 Table). The 10 molecular processes enriched in sneaker males  
333 included ion channel activity, protein binding, ionotropic glutamate receptor  
334 activity, and extracellular glutamate-gated ion channel activity (S5 Table).

335

336 *Spawning Parental Males versus Satellite Males.* A total of 1,141 transcripts were  
337 differentially expressed between spawning parental males and satellite males. Of  
338 these, 676 transcripts had higher expression in parental males (S6 Table) and 465  
339 transcripts showed higher expression in satellite males (S7 Table).



340           Only one GO term related to biological function, oxidation-reduction  
341 processes, was enriched in parental males compared to satellite males (S5 Table).  
342 Six GO terms related to molecular processes were enriched in parental males  
343 relative to satellite males (S5 Table). These were iron ion binding, two types of  
344 oxidoreductase activity, heme binding, acylCoA dehydrogenase activity and catalytic  
345 activity (S5 Table).

346           Only one GO term related to biological function, ion transport, was enriched  
347 in satellite males compared to spawning parental males (S5 Table). Three GO terms  
348 related to molecular processes were enriched in satellite males relative to spawning  
349 parental males. These were nucleic acid binding, ion channel activity, and GTP  
350 binding (S5 Table).

351

### 352 Differential Expression within Life Histories

353 *Satellite Males verses Sneaker Males.* There were 2,590 transcripts differentially  
354 expressed between satellite males and sneaker males. Of these, 2,480 transcripts  
355 were also differentially expressed between spawning parental and sneaker males  
356 and all showed expression to be in the same direction for parental and satellite  
357 males compared to sneakers (i.e. those with higher expression in parental males  
358 compared to sneaker males were also higher in satellite males compared to  
359 sneakers). Only 110 transcripts were differentially expressed in satellite males  
360 compared to sneaker males that were not also differentially expressed between  
361 parental and sneaker males. Seventy-six transcripts had higher expression levels in  
362 satellite males (S8 Table) and 34 transcripts had higher expression in sneaker males

363 (S9 Table). The number of transcripts differentially expressed was too low to have  
364 adequate statistical power to perform enrichment analysis for GO terms. However,  
365 many of the transcripts with higher expression in satellite males are associated with  
366 GTP catabolism, while many transcripts with higher expression in sneaker males are  
367 involved in signal transduction, neural crest cell migration, and DNA integration.

368

369 *Spawning Parental Males verses Non-Spawning Parental Males.* A total of 137  
370 transcripts were differentially expressed between spawning and non-spawning  
371 parental males. The majority of these transcripts (132 transcripts) showed higher  
372 expression in spawning males (S10 Table). Genes with the highest expression in  
373 spawning parental males compared to non-spawning males were MHC II beta  
374 antigen, cytosolic 5'-nucleotidase II (*nt5c2*), cAMP responsive element modulator a  
375 (*crem*), cysteine dioxygenase type 1 (*cdo1*), and an uncharacterized protein. Only 8  
376 transcripts showed higher expression in non-spawning parental males. These were  
377 nuclear receptor subfamily 1 group D member 4b (*nr1d4b*), neuronal tyrosine-  
378 phosphoinositide-3-kinase adaptor 2 (*nyap2*), sphingosine-1-phosphate receptor 4  
379 (*s1pr4*), gamma-aminobutyric acid A receptor beta 3 (*gabrb3*), and four  
380 uncharacterized proteins (S11 Table). Again, the number of transcripts assigned to  
381 GO term was too small to have adequate statistical power to perform an enrichment  
382 analysis for this comparison.

383

384

385

386 Sex Differences

387 Two unique transcripts were differentially expressed between females and  
388 all of the male groups (sneaker, satellite, spawning parental male, and non-  
389 spawning parental males) (Table 2). These corresponded to galanin/GMAP  
390 prepropeptide (*gal*) and protachykinin (*tac*) and both were expressed at lower  
391 levels in females. Expression profiles of females were more similar to spawning and  
392 non-spawning parental males than to satellite males, despite females' and satellites'  
393 similarity in spawning behavior (Figure 2).

394

395 Potential Candidate Genes Associated with ART Spawning Behavior

396 We observed differential expression of a number of transcripts previously  
397 identified as potential candidate genes associated with differences in ART spawning  
398 behaviors (described in Table 1) (Table 3). In our data set, the candidate genes  
399 *cyp19a1b*, *epd*, and *gal* showed higher expression in spawning parental males  
400 compared to sneaker males. *Epd* also had higher expression in satellite males  
401 compared to sneakers. *Egr1* showed higher expression in both satellite and sneaker  
402 males relative to spawning parental males. *Sst1* showed higher expression in  
403 satellite males compared to sneaker males, but no differences in other comparisons  
404 between tactics. No differences in expression related to *gnrh*, *avt*, or *sst3* were  
405 observed between any of our groups.

406

407

408

409

410 **Table 3: Gene expression differences (log2 fold change) among male tactics for proposed**  
 411 **candidate genes (see Table 1).**

| Proposed Candidate Gene                        | Isoform ID   | Comparison between Male Tactics (Log2 Fold Change) |                     |                     | Spawn Parent vs |
|------------------------------------------------|--------------|----------------------------------------------------|---------------------|---------------------|-----------------|
|                                                |              | Parent vs Sneak                                    | Parent vs Sat       | Sat vs Sneak        | NonSpawn        |
| Arginine vasotocin ( <i>avt</i> )              | c34708_g2_i1 | 0.45 [0.32]                                        | -0.98 [0.09]        | 0.54 [0.33]         | 0.74 [0.50]     |
| Gonadotropin releasing hormone ( <i>gnrh</i> ) | c63124_g1_i1 | 0.76 [0.50]                                        | 0.32 [0.87]         | 0.44 [0.77]         | 0.77 [0.88]     |
| Cytochrome P450 19a1b ( <i>cyp19a1b</i> )      | c48084_g2_i1 | <b>0.93 [0.0002]</b>                               | 0.64 [0.06]         | 0.28 [0.40]         | 0.39 [0.58]     |
| Ependymin ( <i>epd</i> )                       | c44195_g1_i5 | <b>1.54 [1.4 x 10<sup>-8</sup>]</b>                | 0.66 [0.07]         | <b>0.89 [0.007]</b> | -0.51 [0.45]    |
| Galanin/GMAP prepropeptide ( <i>gal</i> )      | c41071_g5_i2 | <b>1.12 [0.0001]</b>                               | 0.53 [0.91]         | -0.59 [0.10]        | 0.09 [0.97]     |
| Somatostatin 1 ( <i>sst1</i> )                 | c30013_g1_i1 | 0.53 [0.15]                                        | -0.39 [0.49]        | <b>0.93 [0.03]</b>  | 0.27 [0.88]     |
| Somatostatin 3 ( <i>sst3</i> )                 | c46547_g6_i1 | 0.001 [1.00]                                       | -0.25 [0.54]        | 0.25 [0.48]         | 0.15 [0.90]     |
| Early growth response 1 ( <i>egr1</i> )        | c37907_g1_i1 | <b>-0.74 [0.02]</b>                                | <b>-0.91 [0.03]</b> | 0.16 [0.72]         | -0.63 [0.42]    |

412

413 Values in brackets represent p-values after false discovery rate correction. Values in bold are  
 414 significant at  $p < 0.05$ . Parent = parental male, Sneak = sneaker male, Sat = satellite male, NonSpawn  
 415 = non-spawning parental male.

416

417

418 In addition to these previously identified candidate genes, another transcript  
 419 that displayed large differences in expression between spawning parental males and  
 420 all other groups (including non-spawning males) was associated with cAMP-  
 421 responsive element modulator (*crem*) (Table 2). Multiple isoforms of the transcript  
 422 were expressed, with log2 fold changes ranging from 1.3 – 2.6 times higher in  
 423 spawning parental males compared to other groups. Consistent with the finding for  
 424 GO term enrichment, transcripts that showed the highest levels of expression in  
 425 sneaker males compared to other groups were related to glutamate receptor genes,  
 426 particularly AMPA ionotropic glutamate receptors (S2 Table).

427 In addition to the candidate genes listed in Table 1, a number of endocrine  
 428 genes were differentially expressed among two or more male tactics. Among these  
 429 genes are a number of genes that we consider candidate genes based on

430 documented male tactic differences in circulating steroid hormone levels on the day

431 of spawning [38,39,42]. Further investigation of these genes is currently in progress  
432 and will be reported elsewhere.

433 The datasets supporting the conclusions of this article are available on the  
434 Sequence Read Archive (SRA) through BioProject ID: PRJNA287763. Environmental  
435 data, RNA quality information, the assembled transcriptome, the transcript count  
436 matrix, and R code for differential gene analysis are currently available for review at  
437 the following link ([https://www.dropbox.com/sh/jxbgsiyrz89npfn/AAA5n-  
438 jNR0zhHcPcEPr1CT72a?dl=0](https://www.dropbox.com/sh/jxbgsiyrz89npfn/AAA5n-jNR0zhHcPcEPr1CT72a?dl=0)) and will be available on Dryad upon acceptance.

439

## 440 Discussion

441 Bluegill sunfish are a classic system for examining behavioral differences in  
442 ARTs. In this study, we generated and assembled the first bluegill brain  
443 transcriptome and identified candidate genes that contribute to differences in male  
444 spawning tactics. The main differences in gene expression were found between  
445 sneaker males when compared to the two other male tactics and females. Generally,  
446 sneaker males showed higher expression in transcripts influencing neural activity,  
447 whereas parental and satellite males exhibited higher expression in genes related to  
448 translation and oxidoreductase activity. There were larger differences in transcript  
449 expression among different male tactics than between males and females.

450

### 451 Overall Expression Differences among ARTs

452 One of our main findings is that a shared life history does not appear to be a  
453 driving factor influencing similarity in neural gene expression among male tactics.

454 In bluegill, parental and cuckolder life histories are fixed, but within the cuckolder  
455 life history, males transition from the sneaking to the satellite tactic as they age  
456 [34,38]. Our data showed that, regardless of whether comparisons were made  
457 across fixed (parental versus sneaker or parental versus satellite) or plastic  
458 (sneaker versus satellite) tactics, sneaker males showed the highest level of  
459 differentiation in gene transcription. Similar results have been observed in the  
460 ocellated wrasse, where sneaking males also showed greater differences compared  
461 to other tactics [19]. The expression differences in sneakers may be partially due to  
462 age because sneaker males in both bluegill and ocellated wrasse are typically  
463 younger than satellite and parental or territorial males (although this is not always  
464 the case for *S. ocellatus* [53]). Genes associated with increased age in other fish  
465 species, such as translation elongation and ribosomal proteins [54], had higher  
466 levels of expression in parental and satellite males compared to sneaker males in  
467 our dataset. In addition to age, differences in expression may also be characteristic  
468 of behavioral differences. Behaviors exhibited by sneaker males during spawning  
469 usually differ in fundamental aspects from those of other male tactics. In the  
470 ocellated wrasse, for example, satellite and nesting males cooperatively protect the  
471 nest from sneakers and other egg predators [55], potentially leading to similar  
472 expression profiles between these tactics. In bluegill, satellite and parental males  
473 associate closely with the female throughout spawning, whereas sneakers dart in  
474 and out of the nest. These differences in spawning tactics might also contribute to  
475 the differences in gene expression observed in the two studies. Thus, age and

476 spawning tactic are likely important contributors to gene expression patterns across  
477 ARTs, and life history is not exclusively responsible for these differences.

478

#### 479 Gene Categories Associated with ARTs

480 Identifying distinct gene categories expressed by ART types provides  
481 information regarding which gene classes influence behavioral differences during  
482 spawning. Previous studies in sailfin mollies, *Poecilia latipinna*, and Atlantic salmon,  
483 *Salmo salar*, indicate that sneaker males have increased expression of genes related  
484 to neurotransmission and learning [15,17]. We found that the GO terms enriched in  
485 bluegill sneaker males compared to all other groups were the ionotropic glutamate  
486 signaling pathway and ionotropic glutamate receptor activity. Ionotropic glutamate  
487 receptors are primarily excitatory neurotransmitter receptors and play an  
488 important role in fast synaptic transmission [reviewed in 56]. Two of these  
489 receptors, NMDA and AMPA, play important roles in memory function and spatial  
490 learning [reviewed in 57]. Blocking NMDA receptors impairs learning new spatial  
491 locations in goldfish [58] and mice with impaired AMPA receptors show normal  
492 spatial learning but have impaired working spatial memory (i.e. their ability to alter  
493 their spatial choice in response to changing environments is impaired) [59]. We  
494 propose that increased expression of genes related to spatial memory, particularly  
495 working spatial memory, could be important for bluegill sneakers during spawning  
496 as they attempt to gain access to nests while avoiding detection not only by the  
497 parental males, but also common predators around the colony [60]. Bluegill  
498 sneakers must also position themselves in close proximity to females so they can

499 time sperm release to coincide with female egg release [61]. Similarly, sailfin molly  
500 sneakers, who also show enrichment in ionotropic glutamate related genes [17],  
501 probably benefit from increased working spatial memory as they position  
502 themselves by the female for quick and successful copulations. In this context,  
503 increased expression in gene pathways that improve neural function related to  
504 working spatial memory would be especially beneficial for sneaking tactics to  
505 increase their reproductive success.

506         While ARTs with fixed tactics maintain the same mating tactic over their  
507 lifetime, ARTs with plastic tactics can alter their behavior and, in some cases their  
508 phenotype, when switching from one tactic to another. Diverse phenotypes can be  
509 accomplished without altering the underlying genomic sequence through a number  
510 of mechanisms including epigenetic regulation, alternative gene splicing, and post-  
511 translational modification of proteins. A number of genes involved in these  
512 processes showed higher expression in the plastic tactics (satellite and sneaker)  
513 compared to the fixed parental tactic (Table 2). For example, *ogt* plays a key role in  
514 chromatin restructuring and post-translational modification of proteins [62]. It has  
515 been also implicated in a number of different processes including nutrient and  
516 insulin signaling [63,64], sex-specific prenatal stress [65], and behavioral plasticity  
517 [66]. Genes associated with alternative splicing that were expressed at higher levels  
518 in plastic tactics included isoforms of serine/arginine-rich proteins (SR proteins), a  
519 family of proteins involved in RNA splicing [67], and CLK-4 like proteins, which are  
520 kinases that function in regulating SR protein activity [68]. Similarly, differential  
521 expression of RNA splicing genes have also been observed in two other teleost



522 species with plastic tactics, the black-faced blenny and intermediate-sized sailfin  
523 mollies [17,18]. While the mechanisms influencing how ART males switch between  
524 tactics is currently unresolved, epigenetic regulation, alternative gene splicing, and  
525 post-transcriptional modifications could be important for plastic tactics in altering  
526 their phenotype in response to environmental or developmental cues.

527

### 528 Sex Differences

529 Neural differences between the sexes are common and found in many taxa  
530 [reviewed in 69,70]. However, within ARTs, differences in neural expression profiles  
531 can often be larger among male tactics than between males and females [18-20]. In  
532 bluegill, only two transcripts were differentially expressed in females compared to  
533 all male groups and these corresponded to *gal* and *tac*. *Gal* and *tac* are  
534 neuropeptides and neurons expressing these genes have been associated with male  
535 sexual behavior and aggression [27, 71]. Injections of *gal* into the preoptic area  
536 (MPOA) of the brain increase sexual behaviors in male rats [27] and stimulate both  
537 male-typical and female-typical sexual behaviors in females [72]. In male rats,  
538 testosterone can enhance the pituitary's response to *gal*, which heightens *gnrh*'s  
539 stimulation of luteinizing hormone (LH). If *gal* is directly involved in regulating *gnrh*  
540 response in bluegill, this neuropeptide may play an important role in behavioral  
541 differences between the sexes. In sequential hermaphroditic fish, surges in *gnrh*  
542 drive the switch from female to male [73]. While bluegill are gonochoristic, gonadal  
543 sex is not evident until 30-60 days post hatch [74] and changes in sex can be  
544 hormonally induced [75]. Thus, *gal* expression, through its influence on *gnrh*, may

545 play an important role in sex differences for this species. In addition, *gal* also  
546 stimulates feeding in fish [reviewed in 76] and feeding may indeed differ between  
547 female and male sunfish in the days leading up to and including spawning.

548 The role of *tac* in influencing sexual behaviors in teleosts has not been  
549 addressed, but *tac* expression significantly increases in the brain of male eels during  
550 sexual maturation [77] and leads to increased male aggression in *Drosophila* [71]. In  
551 bluegill, the primary role of *tac* may not be male-male aggression considering higher  
552 expression levels of this gene are also observed in the non-aggressive satellite and  
553 sneaker males when compared to females. Although the ways in which *gal* and *tac*  
554 specifically influence sex-specific behaviors in bluegill is currently undefined, the  
555 fact that lower expression is consistently observed in females compared to all male  
556 groups suggests they are important sex-specific neural genes.

557

#### 558 Candidate Genes Associated with ARTs

559 A number of candidate genes have been proposed to influence the expression  
560 of ARTs in teleosts [18] (Table 1). In our study of bluegill, we corroborate some of  
561 these candidates. For example, *cyp19a1b*, *epd*, and *gal* had higher expression levels  
562 in spawning parental males compared to sneaker males. The expression patterns for  
563 all three genes are similar to what has been observed in cichlids [16]. In addition,  
564 expression of *epd* is lower in rainbow trout, *Oncorhynchus mykiss*, males that use a  
565 sneaking tactic versus males that are dominant and territorial [25], which is also  
566 consistent with our findings. In contrast, the one candidate gene that was expressed  
567 opposite to expectations was *egr1*. *Egr1* expression was lower in bluegill spawning

568 parental males compared to sneaker or satellite males although previous work in  
569 cichlids found that expression of this gene increases when subdominant males  
570 transition into dominant males [29]. *Egr1* is an important transcription factor  
571 involved in neural plasticity [78], so it may be one of a group of genes involved in  
572 regulating the switch from one tactic to another. Taken together, our results  
573 corroborate roles for *cyp19a1b*, *epd*, *gal*, and *egr1* as candidate genes contributing to  
574 behavioral differences in ARTs across species. This study is a first step in examining  
575 how bluegill ARTs differ in neural gene expression during spawning, and future  
576 work will explore how candidate genes are expressed across different brain regions,  
577 as some studies have found regional differences associated with genes, such as *avt*,  
578 in other species with ARTs [21, 79-82].

579         We also identified one transcript with a previously unrecognized function in  
580 influencing male spawning behavior for any teleost. Transcripts corresponding to  
581 isoforms of *crem* were expressed at significantly higher levels in spawning parental  
582 males compared to all other male groups, including non-spawning parental males.  
583 *Crem* plays a key role in modulating the hypothalamic-pituitary-gonadal axis by  
584 regulating transcriptional responses to cAMP in neuroendocrine cells and also  
585 serves as an important activator of spermatogenesis in Sertoli cells of mice [83-85].  
586 This gene can act as both transcriptional activator and inhibitor depending on the  
587 splice variant produced [83]. One splice variant is inducible cAMP early repressor  
588 (ICER), a powerful repressor of cAMP-regulated transcription [86]. ICER plays a key  
589 role in circadian melatonin synthesis by repressing the key enzyme that converts  
590 serotonin to melatonin [87]. Both serotonin and melatonin can influence behavioral

591 responses in fish [88-91]. High levels of these neurotransmitters have been  
592 associated with increased mating and cooperative behavior and decreased  
593 aggressive behavior [88,90,91]. ICER has not yet been well characterized in teleosts  
594 but one of our differentially expressed *crem* transcripts had a significant blast hit to  
595 an ICER variant from *Epinephelus brunes* (longtooth grouper). The relationship  
596 among *crem*, melatonin, and aggression is opposite to what would be expected if  
597 ICER is playing a role since parental males have darker pigmentation and are more  
598 aggressive than other groups [60, 92-94]. However, increased expression of *crem*,  
599 whether through ICER or another *crem* transcript variant, could be a candidate gene  
600 influencing behaviors associated with parental male spawning given its role in  
601 transcriptional regulation and its involvement in the hypothalamic-pituitary-  
602 gonadal axis.

603         In summary, our work describes differences in gene expression profiles in  
604 the brains of bluegill sunfish during spawning. The largest differences in expression  
605 levels were observed when comparing sneakers to parental males, satellite males,  
606 and females, suggesting that differences in gene expression are more related to male  
607 reproductive tactic than to life history. Consistent with other studies, our work  
608 demonstrates that sneaker males have greater expression of genes involved in  
609 neural function relative to more territorial-type males, particularly in relation to  
610 working spatial memory, as mediated by ionotropic glutamate receptors. We also  
611 found support for the previously identified candidate genes *cyp19a1b*, *epd*, *gal*, and  
612 *egr1* contributing to behavioral differences in ARTs and identified a potential new  
613 candidate gene, *crem*, for regulating parental males' behavior during spawning.

614

## Acknowledgments

615 We thank Scott Colborne for his help in collecting bluegill, Dave Bridges for  
616 providing the R script to convert Ensemble IDs to stickleback homologs, and David  
617 Winter and Jeramia Ory for providing Python script used in the bioinformatics  
618 analyses. We also thank Shawn Garner, Tim Hain, Lauren Kordonowy, and Lindsay  
619 Havens for helpful comments on the manuscript.

620

621

## References

622

- 623 1. Gross MR. Alternative reproductive strategies and tactics: diversity within sexes.  
624 Trends Ecol Evol. 1996;11:92-8.
- 625 2. Mank JE, Avise JC. The evolution of reproductive and genomic diversity in ray-  
626 finned fishes: insights from phylogeny and comparative analysis. J Fish Biol.  
627 2006;69:1-27.
- 628 3. Oliveira RF. Neuroendocrine mechanisms of alternative reproductive tactics in  
629 fish. In Behavior and Physiology of Fish (Sloman KA, Wilson RW, Balshine S,  
630 eds) Fish Physiology 2006; Vol 24 pg 297-357.
- 631 4. Taborsky M, Oliveira RF, Brockmann HJ. The evolution of alternative reproductive  
632 tactics: concepts and questions. In: Oliveira RF, Taborsky M, Brockmann HJ,  
633 editors. Alternative reproductive tactics: an integrative approach.  
634 Cambridge: Cambridge University Press; 2008. p. 1-21.
- 635 5. Taborsky M, Brockmann HJ. Alternative reproductive tactics and life history  
636 phenotypes. In: Kappeler P, editor. Animal behavior: evolution and  
637 mechanisms. Berlin: Springer; 2010. p. 537-586.
- 638 6. Taborsky M. Sperm competition in fish: 'Bourgeois' males and parasitic spawning.  
639 Trends Ecol Evol. 1998;13:222-7.
- 640 7. Lank DB, Smith CM, Hanotte O, Burke T, Cooke F. Genetic polymorphism for  
641 alternative mating behaviour in lekking male ruff *Philomachus pugnax*.  
642 Nature. 1995;378:59-62.
- 643 8. Schuster SM, Sassaman C. Genetic interaction between male mating strategy and  
644 sex ratio in a marine isopod. Nature. 1997;388:373-7.
- 645 9. Kupper C, Stocks M, Risse JE, dos Remedios N, Farrell LL, McRae SB, Morgan TC,  
646 Karlionova N, Pinchuk P, Verkuil YI, Kitaysky AS, Wingfield JC, Piersma T,  
647 Zeng K, Slate J, Blaxter M, Lank DB, Burke T. A supergene determines highly  
648 divergent male reproductive morphs in the ruff. Nature Genet. 2015;  
649 doi:10.1038/ng.3443.
- 650 10. Lamichhaney S, Fan G, Widemo F, Gunnarsson U, Schwochow Thalmann D,  
651 Hoepfner MP, Kerje S, Gustafson U, Shi C, Zhang H, Chen W, Liang X, Huang L,  
652 Wang J, Liang E, Wu Q, Lee SM-Y, Xu X, Höglund J, Liu X, Andersson L.

- 653 Structural genomic changes underlie alternative reproductive strategies in  
654 the ruff (*Philomachus pugnax*). *Nature Genet.* 2015; 48:84-88.  
655 doi:10.1038/ng.3430.
- 656 11. Gross MR, Repka J. Stability with inheritance in the conditional strategy. *J Theor*  
657 *Biol.* 1998;192:445-53.
- 658 12. Piché J, Hutchings JA, Blanchard W. Genetic variation in threshold reaction  
659 norms for alternative reproductive tactics in Atlantic salmon, *Salmo salar*. *P*  
660 *Roy Soc Lond B Biol Sci.* 2008;275:1571-5.
- 661 13. Neff BD, Svensson EI. Polyandry and alternative mating tactics. *Phil Trans R Soc*  
662 *B Biol Sci.* 2013;368:20120045.
- 663 14. Moore MC. Application of organization-activation theory to alternative male  
664 reproductive strategies: A review. *Horm Behav.* 1991;25:154-179.
- 665 15. Aubin-Horth N, Landry CR, Letcher BH, Hofmann HA. Alternative life histories  
666 shape brain gene expression profiles in males of the same population. *P Roy*  
667 *Soc Lond B Biol Sci.* 2005;272:1655-62.
- 668 16. Renn SC, Aubin-Horth N, Hofmann HA. Fish and chips: functional genomics of  
669 social plasticity in an African cichlid fish. *J Exp Biol.* 2008; 211:3041-56.
- 670 17. Fraser BA, Janowitz I, Thairu M, Travis J, Hughes KA. Phenotypic and genomic  
671 plasticity of alternative male reproductive tactics in sailfin mollies. *P Roy Soc*  
672 *Lond B Biol Sci.* 2014;281:20132310.
- 673 18. Schunter C, Vollmer SV, Macpherson E, Pascual M. Transcriptome analysis and  
674 differential gene expression in a non-model fish species with alternative  
675 mating tactics. *BMC Genomics.* 2014;15:167.
- 676 19. Stiver KA, Harris RM, Townsend JP, Hofmann HA, Alonzo SH. Neural gene  
677 expression profiles and androgen levels underlie alternative reproductive  
678 tactics in the ocellated wrasse, *Symphodus ocellatus*. *Ethology.* 2015;121:152-  
679 67.
- 680 20. Cardoso SD, Gonçalves D, Goesmann A, Canário AVM, Oliveria RF. Brain  
681 transcriptome analysis of alternative reproductive tactics in a blennioid fish.  
682 The 35<sup>th</sup> Annual Meeting of the J.B. Johnston Club for Evolutionary  
683 Neuroscience and the 27<sup>th</sup> Annual Karger Workshop in Evolutionary  
684 Neuroscience. *Brain Behav Evol.* 2015; 85: 287-293.
- 685 21. Greenwood AK, Wark AR, Fernald RD, Hofmann HA. Expression of arginine  
686 vasotocin in distinct preoptic regions is associated with dominant and  
687 subordinate behaviour in an African cichlid fish. *P Roy Soc Lond B Biol*  
688 *Sci.* 2008;275:2393-402.
- 689 22. Grober MS, George AA, Watkins KK, Carneiro LA, Oliveira RF. Forebrain AVT and  
690 courtship in fish with male alternative reproductive tactics. *Brain Res Bull.*  
691 2002;57:423-5.
- 692 23. Gonçalves D, Teles M, Alpedrinha J, Oliveira RF. Brain and gonadal aromatase  
693 activity and steroid hormone levels in female and polymorphic males of the  
694 peacock blenny *Salarias pavo*. *Horm Behav.* 2008;54:717-25.
- 695 24. Forlano PM, Bass AH. Seasonal plasticity of brain aromatase mRNA expression in  
696 glia: divergence across sex and vocal phenotypes. *Neurobiology.* 2005;65:37-  
697 49.
- 698 25. Sneddon LU, Schmidt R, Fang Y, Cossins AR. Molecular correlates of social

- 699 dominance: A novel role for ependymin in aggression. PLoS One.  
700 2011;6:e18181.
- 701 26. Thomson JS, Watts PC, Pottinger TG, Sneddon, LU. Physiological and genetic  
702 correlates of boldness: Characterizing the mechanisms of behavioral  
703 variation in rainbow trout, *Oncorhynchus mykiss*. Horm Behav. 2011; 59:67-  
704 74.
- 705 27. Bloch GJ, Butler PC, Kohlert JG, Bloch DA. Microinjection of galanin into the  
706 medial preoptic nucleus facilitates copulatory behavior in the male rat.  
707 Physiol Behav. 1993;54:615-24.
- 708 28. Wu Z, Autry AE, Bergan JF, Watabe-Uchida M, Dulac CG. Galanin neurons in the  
709 medial preoptic area govern parental behavior. Nature. 2014;509: 325-330.
- 710 29. Burmeister SS, Jarvis ED, Fernald RD. Rapid behavioral and genomic responses  
711 to social opportunity. PLoS Biol. 2005;e363.
- 712 30. Le Page Y, Diotel N, Vaillant C, Pellegrini E, Anglade I, Mérot Y, Kah O. Aromatase,  
713 brain sexualization and plasticity: the fish paradigm. Eur J Neurosci.  
714 2010;32:2105-15.
- 715 31. Nakamura M, Kobayashi Y. Sex change in coral reef fish. Fish Physiol Biochem.  
716 2005;31:117-22.
- 717 32. Black MP, Balthazart J, Baillien M, Grober MS. Socially induced and rapid  
718 increases in aggression are inversely related to brain aromatase activity in a  
719 sex-changing fish, *Lythrypnus dalli*. P Roy Soc Lond B Biol Sci.  
720 2005;272:2435-40.
- 721 33. Marsh KE, Creutz LM, Hawkins MB, Godwin J. Aromatase immunoreactivity in  
722 the bluehead wrasse brain, *Thalassoma bifasciatum*: Immunolocalization and  
723 co-regionalization with arginine vasotocin and tyrosine hydroxylase. Brain  
724 Res. 2006;1126:91-101.
- 725 34. Gross MR. Sneakers, satellites and parentals: Polymorphic mating strategies in  
726 North American sunfishes. Z Tierpsychol. 1982;60:1-26.
- 727 35. Dominey WJ. Female mimicry in male bluegill sunfish – a genetic polymorphism?  
728 Nature. 1980;284:546-8.
- 729 36. Neff BD, Gross MR. Dynamic adjustment of parental care in response to  
730 perceived paternity. P Roy Soc Lond B Biol Sci. 2001;268:1559-65.
- 731 37. Gross MR, Charnov EL. Alternative male life histories in bluegill sunfish. Proc Nat  
732 Acad Sci USA. 1980;77:6937-40.
- 733 38. Kindler PM, Philipp DP, Gross MR, Bahr JM. Serum 11-ketotestosterone and  
734 testosterone concentrations associated with reproduction in male bluegill  
735 (*Lepomis macrochirus*: Centrarchidae). Gen Comp Endocrinol. 1989;75:446-  
736 53.
- 737 39. Kindler PM, Bahr JM, Philipp DP. The effects of exogenous 11-ketotestosterone,  
738 testosterone, and cyproterone acetate on prespawning and parental care  
739 behaviors of male bluegill. Horm Behav. 1991;25:410-23.
- 740 40. Neff BD. Genetic paternity analysis and breeding success in bluegill sunfish  
741 (*Lepomis macrochirus*). J Hered. 2001;92:111-9.
- 742 41. Neff BD. Increased performance of offspring sired by parasitic males in bluegill  
743 sunfish. Behav Ecol. 2004;15:327-31.

- 744 42. Knapp R, Neff BD. Steroid hormones in bluegill, a species with male alternative  
745 reproductive tactics including female mimicry. *Biol Lett.* 2007;3:628-31.
- 746 43. Partridge C, Rodgers CMC, Knapp R, Neff BD. Androgen effects on immune gene  
747 expression during parental care in bluegill sunfish (*Lepomis macrochirus*).  
748 *Can J Zool.* 2015;93:9-13.
- 749 44. Bolger AM, Lohse M, Usadel B. Trimmomatic: A flexible trimmer for Illumina  
750 sequence data. *Bioinformatics.* 2014;bt170.
- 751 45. MacManes MD. On the optimal trimming of high-throughput mRNA sequence  
752 data. *Front Genet.* 2014;5:13. doi:10.3389/fgene.2014.00013.
- 753 46. Haas BJ, Papanicolaou A, Yassour M, Grabherr M, Blood PD, Bowden J, Couger  
754 MB, MacManes MD, Ott M, Orvis J, Pochet N, Strozzi F, Weeks N, Westerman  
755 R, William T, Dewey CN, Henschel R, LeDuc RD, Friedman N, Regev A. De  
756 novo transcript sequence reconstruction from RNA-Seq using the Trinity  
757 platform for reference generation and analysis. *Nature Protocols.*  
758 2013;8:1494-512.
- 759 47. Grabherr MG, Haas BJ, Yassour M, Levin JZ, Thompson DA, Amit I, Adiconis X, Fan  
760 L, Raychowdhury R, Zeng Q, Chen Z, Mauceli E, Hacohen N, Gnirke A, Rhind N,  
761 di Palma F, Birren BW, Nusbaum C, Lindblad-Toh K, Friedman N, Regev A.  
762 Full-length transcriptome assembly from RNA-Seq data without a reference  
763 genome. *Nature Biotechnol.* 2011;29:644-52.
- 764 48. Li H. Aligning sequence reads, clone sequences and assembly contigs with BWA-  
765 MEM 2013; arXiv:1303.3997v2 [q-bio.GN]
- 766 49. Li H, Handsaker B, Wysoker A, Fennell T, Ruan J, Homer N, Marth G, Abecasis G,  
767 Durbin R, 1000 Genome Project Data Processing Subgroup. The sequence  
768 alignment/map (SAM) format and SAMtools. *Bioinformatics.* 2009;25:2078-  
769 9.
- 770 50. Roberts A, Pachter L. Streaming fragment assignment for real-time analysis of  
771 sequencing experiments. *Nature Methods.* 2013;10:1-47.
- 772 51. Robinson MD, McCarthy DJ, Smyth GK. EdgeR: a Bioconductor package for  
773 differential expression analysis of digital gene expression data.  
774 *Bioinformatics.* 2010;26:139-40.
- 775 52. Supek F, Bošnjak M, Škunca N, Šmuc T. REVIGO summarizes and visualizes long  
776 lists of Gene Ontology terms. *PLoS ONE.* 2011.  
777 doi:10.1371/journal.pone.0021800
- 778 53. Alonzo SH, Taborsky M, Wirtz P. Male alternative reproductive behaviours in a  
779 Mediterranean wrasse, *Symphodus ocellatus*: Evidence from otoliths for  
780 multiple life-history pathways. *Evol Ecol Res.* 2000;2:997-1007.
- 781 54. Baumgart M, Groth M, Priebe S, Savino A, Testa G, Dix A, Ripa R, Spallotta F,  
782 Gaetano C, Ori M, Tozzini ET, Guthke R, Platzer M, Cellerino A. RNA-seq of the  
783 aging brain in the short-lived fish *N. furzeri* – conserved pathways and novel  
784 genes associated with neurogenesis. *Aging Cell.* 2014;13:965-74.
- 785 55. Taborsky M, Hudde B, Wirtz P. Reproductive behaviour and ecology of  
786 *Symphodus (Crenilabrus) ocellatus*, a European wrasse with four types of  
787 male behaviour. *Behaviour.* 1987;102:82-117.
- 788 56. Lamprecht R, LeDoux J. Structural plasticity and memory. *Nature Rev Neurosci.*  
789 2004;5:45-54.



- 790 57. Riedel G, Platt B, Micheau J. Glutamate receptor function in learning and  
791 memory. *Behav Brain Res.* 2003;140:1-47.
- 792 58. Gómez Y, Vargas JP, Portavella M, López JC. Spatial learning and goldfish  
793 telencephalon NMDA receptors. *Neurobiol Learn Mem.* 2006;85:252-62.
- 794 59. Reisel D, Bannerman DM, Schmitt WB, Deacon RMJ, Flit J, Borchardt T, Seeburg  
795 PH, Rawlins JNP. Spatial memory dissociations in mice lacking GluR1. *Nature*  
796 *Neurosci.* 2002;5:868-73.
- 797 60. Gross MR, MacMillan AM. Predation and the evolution of colonial nesting in  
798 bluegill sunfish (*Lepomis macrochirus*). *Behav Ecol Sociobiol.* 1981;8:163-74.
- 799 61. Stoltz JA, Neff BD. Male size and mating tactic influence proximity to females  
800 during sperm competition in bluegill sunfish. *Behav Ecol Sociobiol.*  
801 2006;59:811-8.
- 802 62. Myers SA, Panning B, Burlingame AL. Polycomb repressive complex 2 is  
803 necessary for the normal site-specific O-GlcNAc distribution in mouse embryonic  
804 stem cells. *Proc Natl Acad Sci USA.* 2011; 201;108:9490-5.
- 805 63. Yang X, Ongusaha PP, Miles PD, Havstad JC, Zhang F, So WV, Kudlow JE, Michell  
806 RH, Olefsky JM, Field SJ, Evans RM. Phosphoinositide signalling links O-  
807 GlcNAc transferase to insulin resistance. *Nature.* 2008;451:964-9.
- 808 64. Lagerlöf O, Slocomb JE, Hong I, Aponte Y, Blackshaw S, Hart GW, Haganir RL. The  
809 nutrient sensor OGT in PVN neurons regulates feeding. *Science.* 2016;341:  
810 1293-6.
- 811 65. Howerton CL, Morgan CP, Fischer DB, Bale TL. O-GlcNAc transferase (OGT) as a  
812 placental biomarker of maternal stress and reprogramming of CNS gene  
813 transcription in development. *Proc Natl Acad Sci USA.* 2013;110:5169-74.
- 814 66. Rexach JE, Clark PM, Mason DE, Neve RL, Peters EC, Hsieh-Wilson LC. Dynamic  
815 O-GlcNAc modification regulates CREB-mediated gene expression and  
816 memory formation. *Nature Chem Biol.* 2012;8:253-61.
- 817 67. Bourgeois CF, Lejeune F, Stévenin. Broad specificity of SR (Serine/Arginine)  
818 proteins in the regulation of alternative splicing of pre-messenger RNA. *Prog*  
819 *Nucl Acid Res.* 2004;78:37-88.
- 820 68. Stamm S. Regulation of alternative splicing by reversible protein  
821 phosphorylation. *J Biol Chem.* 2008;283:1223-7.
- 822 69. Jazin E, Cahill L. Sex differences in molecular neuroscience: from fruit flies to  
823 humans. *Nature Rev Neurosci.* 2010;11:9-17.
- 824 70. Parsch J, Ellegren H. The evolutionary causes and consequences of sex-biased  
825 gene expression. *Nature Rev Genet.* 2013;14:83-7.
- 826 71. Asahina K, Watanabe K, Duistermars B, Hoffer E, González CR, Eyjólfssdóttir EA,  
827 Perona P, Anderson DJ. Tachykinin-expressing neurons control male-specific  
828 aggressive arousal in *Drosophila*. *Cell.* 2014;156:221-35.
- 829 72. Bloch GJ, Butler PC, Kohlert JG. Galanin microinjected into the medial preoptic  
830 nucleus facilitates female-and male-typical sexual behaviors in female rats.  
831 *Physiol Behav.* 1996;59:1147-54.
- 832 73. Frisch A. Sex-change and gonadal steroids in sequentially hermaphroditic teleost  
833 fish. *Rev Fish Biol Fishes.* 2004;14:481-99.

- 834 74. Gao A, Wag HP, Rapp D, O'Bryant P, Wallat G, Wang W, Yao H, Tiu L, MacDonald  
835 R. Gonadal sex differentiation in the bluegill sunfish *Lepomis macrochirus* and  
836 its relation to fish size and age. *Aquaculture*. 2009;294:138-46.
- 837 75. Arslan T, Phelps RP. Directing gonadal differentiation in bluegill, *Lepomis*  
838 *macrochirus* (Rafinesque), and black crappie, *Pomoxis nigromaculatus*  
839 (Lesueur) by periodic estradiol-17 $\beta$  immersions. *Aquacult Res*. 2004;35:397-  
840 402.
- 841 76. Volkoff H, Canosa LF, Unniappan S, Cerdá-Reverter JM, Bernier NJ, Kelly SP, Peter  
842 RE. Neuropeptides and the control of food intake in fish. *Gener Comp*  
843 *Endocrinol*. 2005;142:3-19.
- 844 77. Churcher AM, Pujolar JM, Milan M, Hubbard PC, Martins RST, Saraiva JL, Huertas  
845 M, Bargelloni L, Patarnello T, Marino IAM, Zane L, Canário. Changes in gene  
846 expression profiles of the brain of male European eels (*Anguilla anguilla*)  
847 during sexual maturation. *BMC Genomics*. 2014;15:799.
- 848 78. Jones MW, Errington ML, French PJ, Fine A, Bliss TVP, Garel S, Charnay P, Bozon  
849 B, Laroche S, Davis S. A requirement for the immediate early gene *Zif268* in  
850 the expression of LTP and long-term memories. *Nature Neurosci*.  
851 2001;4:289-96.
- 852 79. Foran CM, Bass AH. Preoptic AVT immunoreactive neurons of a teleost fish with  
853 alternative reproductive tactics. *Gen Comp Endocrinol*. 1998;111:271-82.
- 854 80. Ota Y, Ando H, Ueda H, Urano A. Differences in seasonal expression of  
855 neurohypophysial hormone genes in ordinary and precocious male masu  
856 salmon. *Gen Comp Endocrinol*. 1999;116:40-6.
- 857 81. Schlinger BA, Greco C, Bass AH. Aromatase activity in hindbrain vocal control  
858 region of a teleost fish: divergence among males with alternative  
859 reproductive tactics. *P Roy Soc Lond B Biol Sci*. 1999;266:131-6.
- 860 82. Larson ET, O'Malley DM, Melloni RH. Aggression and vasotocin are associated  
861 with dominant-subordinate relationships in zebrafish. *Behav Brain Res*  
862 2006;167:94-102.
- 863 83. Foulkes NS, Sassone-Corsi P. More is better: activators and repressors from the  
864 same gene. *Cell*. 1992;68:411-4.
- 865 84. Foulkes NS, Mellström B, Benusiglio E, Sassone-Corsi P. Developmental switch of  
866 CREM function during spermatogenesis: from antagonist to activator. *Nature*.  
867 1992;35:80-4.
- 868 85. Sassone-Corsi P. Coupling gene expression to cAMP signaling: role of CREB and  
869 CREM. *Int J Biochem Cell Biol*. 1998;30:27-38.
- 870 86. Molina CA, Foulkes NS, Lalli E, Sassone-Corsi P. Inducibility and negative  
871 autoregulation of CREM: an alternative promoter directs the expression of  
872 ICER, an early response repressor. *Cell*. 1993;75:875-86.
- 873 87. Foulkes NS, Borjigin J, Snyder SH. Rhythmic transcription: the molecular basis  
874 of circadian melatonin synthesis. *Trends Neurosci*. 1997;20:487-92.
- 875 88. Munro AD. Effects of melatonin, serotonin, and naloxone on aggression in  
876 isolated cichlid fish (*Aequidens pulcher*). *J Pineal Res*. 1986;3:257-62.
- 877 89. Sparwasser K. The influence of metoclopramide and melatonin on activity and  
878 schooling behavior in *Chromis viridis* (Cuvier, 1830; Pomacentridae,  
879 Teleostei). *Mar Ecol*. 1987;8:297-312.

- 880 90. Lepage O, Larson ET, Mayer I, Winberg S. Serotonin, but not melatonin, plays a  
881 role in shaping dominant-subordinate relationships and aggression in  
882 rainbow trout. *Horm Behav.* 2005;48:233-42.
- 883 91. Paula JR, Messias JP, Gurtter AS, Bshary R, Soares MC. The role of serotonin in  
884 the modulation of cooperative behavior. *Behav Ecol.* 2015.  
885 doi:10.1093/beheco/arv039.
- 886 92. Avila VL: A field study of nesting behavior of male bluegill sunfish (*Lepomis*  
887 *macrochirus* Rafinesque). *Am Midl Nat.* 1976;96:195-206.
- 888 93. Colgan PW, Nowell WA, Gross MR, Grant JW. Aggressive habituation and rim  
889 circling in the social organization of bluegill sunfish (*Lepomis macrochirus*).  
890 *Environ Biol Fishes.* 1979;4:29-36.
- 891 94. Gross MR. Cuckoldry in sunfishes (*Lepomis*: Centrarchidae). *Can J Zool.*  
892 1979;57:1507-9.  
893

894

### Supporting files

- 895 S1 Table: Annotated reference transcriptome  
896
- 897 S2 Table: Transcripts differentially expressed in sneaker males compared to all  
898 other groups.  
899
- 900 S3 Table: Transcripts with significantly higher expression in bluegill parental males  
901 compared to sneaker males.  
902
- 903 S4 Table: Transcripts with significantly higher expression in bluegill sneaker males  
904 compared to parental males.  
905
- 906 S5 Table: Biological process and molecular function GO terms that are significantly  
907 enriched with genes differentially expressed between tactics.  
908
- 909 S6 Table: Transcripts with significantly higher expression in bluegill parental males  
910 compared to satellite males.  
911
- 912 S7 Table: Transcripts with significantly higher expression in bluegill satellite males  
913 compared to parental males.  
914
- 915 S8 Table: Transcripts with significantly higher expression in bluegill satellite males  
916 compared to sneaker males.  
917
- 918 S9 Table: Transcripts with significantly higher expression in bluegill sneaker males  
919 compared to satellite males.  
920
- 921 S10 Table: Transcripts with significantly higher expression in spawning parental  
922 males compared to non-spawning parental males.  
923

924 S11 Table: Transcripts with significantly higher expression in non-spawning  
925 parental males compared to spawning parental males.  
926

927

928

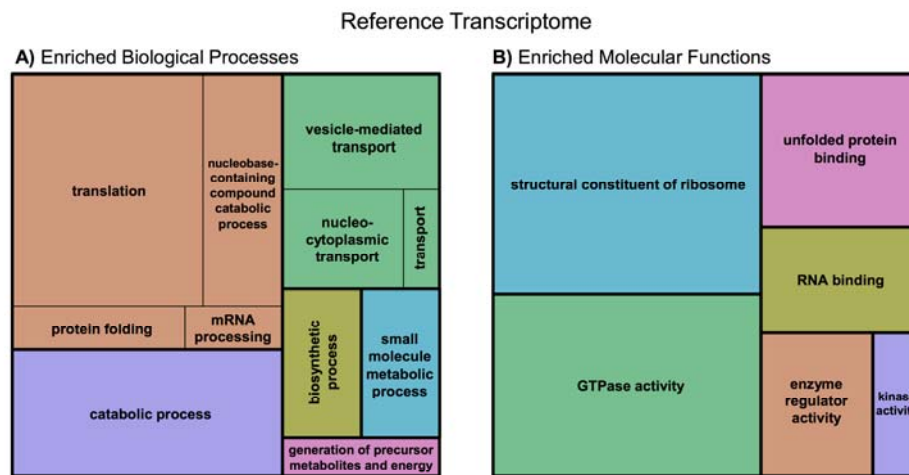

929

930

**Fig. 1: Significant GO terms associated with the reference transcriptome.**

931

GO terms related to (A) biological processes and (B) molecular functions that were significantly enriched in the bluegill reference transcriptome relative to the stickleback genome. Boxes of similar color can be grouped into the same GO term hierarchy. The size of each box reflects the  $-\log_{10}$  p-value of the GO term within each group.

932

933

934

935

936

937

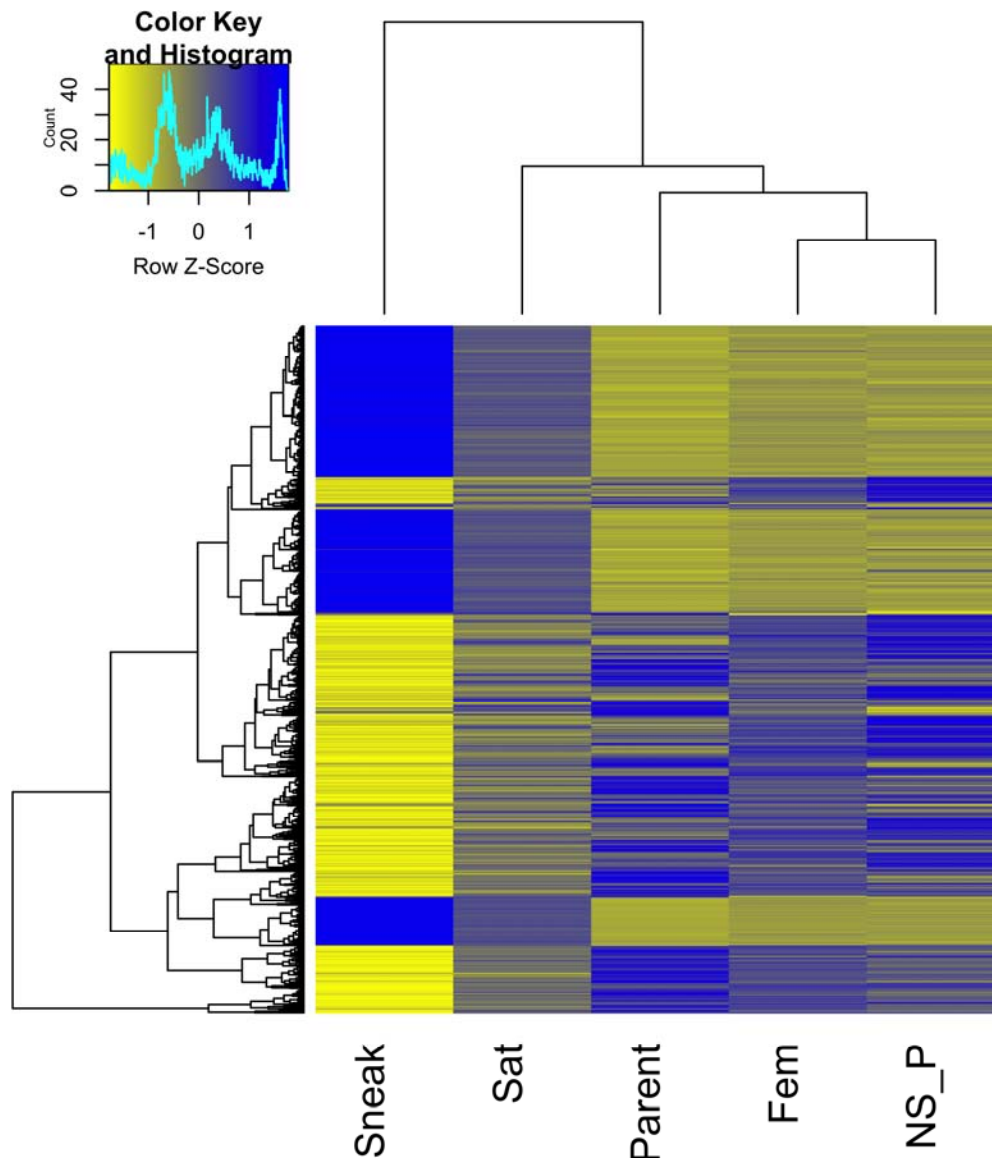

938

939 **Fig. 2: Heatmap of transcripts differentially expressed between at least one**  
940 **group comparison.**

941 Only transcripts with a log<sub>2</sub> fold change of 1.5 or greater are included and 1,400  
942 transcripts are represented. Expression values are scaled by row. Sneak = sneaker  
943 males, Sat = satellite males, Parent = parental males, Fem = females, NS\_P = non-  
944 spawning parental males.

945

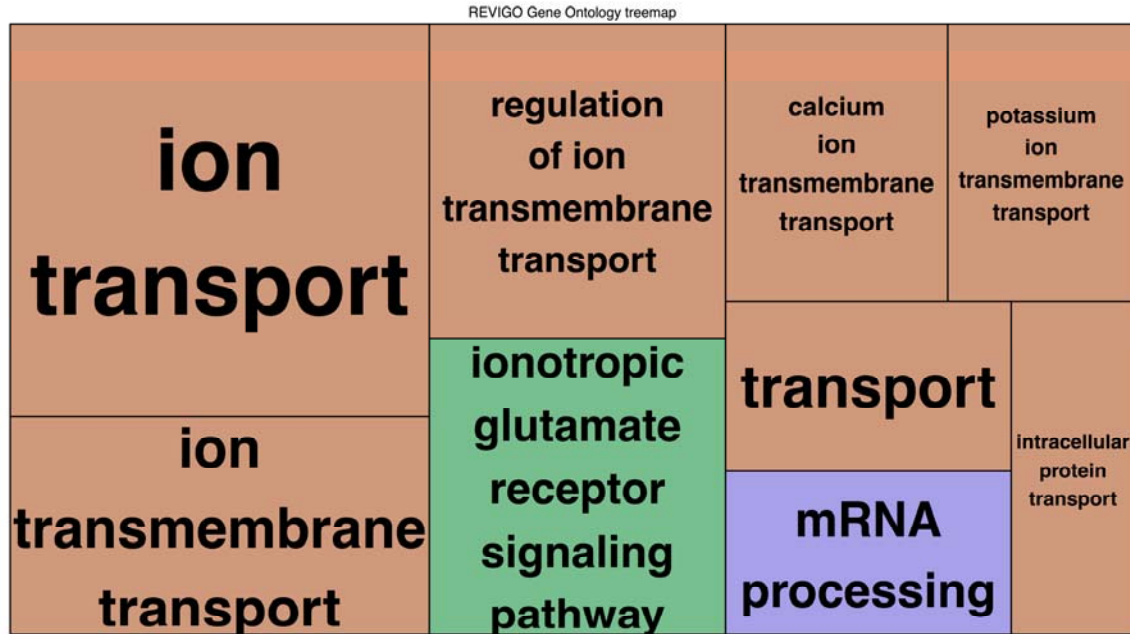

946  
947  
948  
949  
950  
951

**Figure 3: Biological process GO terms enriched by genes with higher expression in sneaker males compared to all other groups.**  
Boxes of similar color are grouped into the same GO term hierarchy. Box size reflects the  $-\log_{10}$  p-value of the GO term.
